# Supplementary material
Source: publisher site journal article supplement (https://www.dovepress.com/get_supplementary_file.php?f=303279.docx)
Supplement: Supplementary file 1 [file get_supplementary_file.php]

Supplementary Table 1 PubMed search – run on 24 February 2021

| **#** | **Search terms (Title/Abstract except MeSH term)** | **Hits** |
| --- | --- | --- |
| 1 | infusion OR infused OR infuse OR injection OR injected OR inject OR administration OR delivery | 2,000,305 |
| 2 | IV OR intravenous OR intravenously OR “i.v.” | 730,893 |
| 3 | #1 AND #2 | 261,778 |
| 4 | IVIg | 7789 |
| 5 | immunoglobulin OR immunoglobulins OR “immune globulin” OR “immune globulins” | 163,368 |
| 6 | infusion OR replacement OR therapy | 2,378,963 |
| 7 | #5 AND #6 | 21,717 |
| 8 | infliximab | 12,899 |
| 9 | #3 OR #4 OR #7 OR #8 | 296,673 |
| 10 | SC OR subcutaneous OR subcutaneously OR “s.c.” | 248,860 |
| 11 | #1 AND #10 | 94,136 |
| 12 | SCIg | 317 |
| 13 | hypodermoclysis | 139 |
| 14 | adalimumab OR certolizumab OR etanercept OR golimumab | 13,023 |
| 15 | #11 OR #12 OR #13 OR #14 | 106,948 |
| 16 | patient preference [MeSH Major Topic] | 5687 |
| 17 | prefer OR preference OR preferences OR preferred OR preferring | 305,554 |
| 18 | “patient preference” | 4796 |
| 19 | “trade off” OR trade-off OR tradeoff | 21,136 |
| 20 | “standard gamble” OR “standard reference gamble” | 877 |
| 21 | “health state” OR health-state | 4510 |
| 22 | vignette OR vignettes | 11,346 |
| 23 | #16 OR #17 OR #18 OR #19 OR #20 OR #21 OR #22 | 340,244 |
| 24 | #9 AND #15 AND #23 | 459 |

Supplementary Table 2 Embase search – run on 24 February 2020

| **#** | **Search terms (Title/Abstract except Emtree term)** | **Hits** |
| --- | --- | --- |
| 1 | infusion OR infused OR infuse OR injection OR injected OR inject OR administration OR delivery | 2 627 914 |
| 2 | IV OR intravenous OR intravenously OR ‘i.v.’ | 1 029 138 |
| 3 | #1 AND #2 | 358 387 |
| 4 | IVIg | 18 102 |
| 5 | immunoglobulin OR immunoglobulins OR 'immune globulin' OR 'immune globulins' | 202 057 |
| 6 | infusion OR replacement OR therapy | 3 259 156 |
| 7 | #5 AND #6 | 33 717 |
| 8 | infliximab | 26 942 |
| 9 | #3 OR #4 OR #7 OR #8 | 423 066 |
| 10 | SC OR subcutaneous OR subcutaneously OR ‘s.c.’ | 348 036 |
| 11 | #1 AND #10 | 134 036 |
| 12 | SCIg | 830 |
| 13 | hypodermoclysis | 165 |
| 14 | adalimumab OR certolizumab OR etanercept OR golimumab | 29 856 |
| 15 | #11 OR #12 OR #13 OR #14 | 163 098 |
| 16 | Patient preference [Major Emtree subject] | 20 011 |
| 17 | prefer OR preference OR preferences OR preferred OR preferring | 385 095 |
| 18 | 'patient preference' | 7133 |
| 19 | 'trade off' OR 'trade-off' OR tradeoff | 21 868 |
| 20 | 'standard gamble' OR 'standard reference gamble' | 1126 |
| 21 | 'health state' OR 'health-state' | 7341 |
| 22 | vignette OR vignettes | 14 625 |
| 23 | #16 OR #17 OR #18 OR #19 OR #20 OR #21 OR #22 | 430 198 |
| 24 | #9 AND #15 AND #23 | 1104 |

Supplementary Table 3 Cochrane database search – run on 24 February 2021

| **#** | **Search terms (Title/Abstract)** | **Hits** |
| --- | --- | --- |
| 1 | infusion OR infused OR infuse OR injection OR injected OR inject OR administration OR delivery | 272 411 |
| 2 | IV OR intravenous OR intravenously OR “i.v.” | 128 693 |
| 3 | #1 AND #2 | 58 403 |
| 4 | IVIg | 1387 |
| 5 | immunoglobulin OR immunoglobulins OR “immune globulin” OR “immune globulins” | 6967 |
| 6 | infusion OR replacement OR therapy | 371 531 |
| 7 | #5 AND #6 | 2317 |
| 8 | infliximab | 2189 |
| 9 | #3 OR #4 OR #7 OR #8 | 62 593 |
| 10 | SC OR subcutaneous OR subcutaneously OR “s.c.” | 34 875 |
| 11 | #1 AND #10 | 16 675 |
| 12 | SCIg | 73 |
| 13 | hypodermoclysis | 16 |
| 14 | adalimumab OR certolizumab OR etanercept OR golimumab | 5728 |
| 15 | {OR #11-#14} | 21 652 |
| 16 | MeSH descriptor: [Patient Preference] explode all trees | 769 |
| 17 | prefer OR preference OR preferences OR preferred OR preferring | 27 170 |
| 18 | “patient preference” | 2009 |
| 19 | “trade off” OR trade-off OR tradeoff | 637 |
| 20 | “standard gamble” OR “standard reference gamble” | 85 |
| 21 | “health state” OR health-state | 775 |
| 22 | vignette OR vignettes | 1131 |
| 23 | {OR #16-#22} | 29 502 |
| 24 | #9 AND #15 AND #23 | 156 |

Supplementary Table 4 Included immune system disorders

| **IVIg indications**   - Any immunodeficiency, including primary immunodeficiency, secondary immunodeficiency and common variable immune deficiency - Multifocal motor neuropathy - Chronic inflammatory demyelinating polyneuropathy - Immune thrombocytopenia - Myasthenia gravis - Guillain-Barré syndrome |
| --- |
| **Autoimmune diseases**   - Rheumatoid arthritis - Any spondyloarthritis - Multiple sclerosis - Inflammatory bowel disease, including Crohn’s disease and ulcerative colitis - Systemic lupus erythematosus - Asthma - Autoimmune skin diseases including psoriasis (and psoriatic arthritis) and atopic dermatitis - Type 1 diabetes mellitus (but not type 2 diabetes mellitus) - Other autoimmune hormone diseases (including Addison’s, Graves’ etc) |

Supplementary Table 5 Risk of bias assessment

| **Study** | **Is the source population representative of the population of interest?** | **Is the response rate adequate?** | **Is there little missing data?** | **Is the survey clinically sensible?a** | **Is there any evidence for the reliability and validity of the survey instrument? b** |
| --- | --- | --- | --- | --- | --- |
| Fasth et al 2007 | Probably no | Definitely yes | Definitely yes | Probably yes | N/A |
| Gardulf et al 2004 | Probably yes | Definitely yes | Definitely yes | Probably yes | N/A |
| Misbah et al 2011 | Probably no | Definitely yes | Definitely yes | Probably yes | N/A |
| Samaan et al 2014 | Definitely yes | Definitely yes | Definitely yes | Probably yes | N/A |
| Hoffmann et al 2010 | Probably yes | Definitely yes | Definitely yes | Probably yes | N/A |
| Desai et al 2009 | Probably no | Definitely yes | Definitely yes | Probably yes | N/A |
| Gladiator et al 2017 | Probably yes | Definitely yes | Definitely yes | Probably yes | N/A |
| Nicolay et al 2006 | Probably yes | Definitely yes | Definitely no | Probably yes | N/A |
| Eftimov et al 2009 | Probably no | Definitely yes | Definitely yes | Probably yes | N/A |
| Permin et al 2009 | Probably yes | Definitely yes | Definitely yes | Probably yes | N/A |
| van Schaik et al 2018 | Probably no | Definitely yes | Definitely no | Probably yes | N/A |
| Runken et al 2016 | Probably no | Probably yes | Definitely yes | Probably yes | N/A |
| Harbo et al 2009 | Probably no | Definitely yes | Definitely yes | Probably yes | N/A |
| Chapel et al 2000 | Probably no | Definitely yes | Definitely yes | Probably yes | N/A |
| Espanol et al 2014 | Probably yes | Probably no | Definitely yes | Probably yes | Probably yes |
| Hadden et al 2015 | Probably no | Definitely yes | Definitely yes | Probably yes | N/A |
| Mohamed et al 2012 | Probably yes | Probably no | Definitely yes | Probably yes | Probably yes |
| Reid et al 2014 | Probably yes | Probably no | Definitely yes | Probably yes | N/A |
| Gelhorn et al 2019 | Probably yes | Probably no | Definitely yes | Probably yes | Probably yes |
| Sylwestrzak et al 2014 | Definitely yes | Probably yes | Definitely yes | Probably yes | N/A |
| Perez et al 2017 | Probably no | Definitely yes | Definitely yes | Probably yes | N/A |
| Santus et al 2019 | Probably yes | Probably no | Definitely yes | Probably yes | N/A |
| Huynh et al 2014 | Probably no | Definitely yes | Definitely yes | Probably yes | N/A |
| Dashiell-Aje et al 2018 | Probably no | Probably no | Definitely yes | Probably yes | N/A |
| Borruel et al 2015 | Probably yes | Probably yes | Probably yes | Probably yes | N/A |
| Van Deen et al 2020 | Probably yes | Probably yes | Probably yes | Probably yes | N/A |
| Fernandes et al 2015 | Probably no | Definitely yes | Definitely yes | Probably yes | N/A |
| Kariburyo et al 2017 | Probably yes | Probably no | Definitely yes | Probably yes | N/A |
| Desplats et al 2017 | Probably yes | Definitely yes | Definitely yes | Probably yes | N/A |
| Chilton et al 2008 | Probably yes | Probably no | Definitely yes | Probably yes | N/A |
| Scarpato et al 2010 | Definitely yes | Definitely yes | Definitely yes | Probably yes | N/A |
| Bolge et al 2016 | Probably yes | Probably no | Definitely yes | Probably yes | N/A |
| Edel et al 2020 | Probably yes | Definitely yes | Definitely yes | Probably yes | N/A |
| Capelusnik et al 2019 | Probably no | Probably no | Probably yes | Probably yes | N/A |
| Falanga et al 2019 | Probably no | Probably yes | Definitely yes | Definitely yes | Probably yes |
| Nagahori et al 2011 | Probably yes | Probably yes | Definitely yes | Probably yes | N/A |
| Tłustochowicz et al 2013 | Probably yes | Probably yes | Definitely yes | Probably yes | N/A |
| Grisanti et al 2019 | Probably yes | Probably no | Definitely yes | Probably yes | N/A |
| Adlard et al 2018 | Probably no | Probably yes | Definitely yes | Probably yes | Probably yes |
| Allen et al 2010 | Probably yes | Probably no | Definitely yes | Probably yes | N/A |
| Cha et al 2017 | Definitely yes | Probably no | Definitely yes | Probably yes | N/A |
| Emadi et al 2017 | Definitely yes | Probably no | Definitely yes | Probably yes | N/A |
| Willeke et al 2011 | Probably no | Probably no | Definitely yes | Probably yes | N/A |
| Wu et al 2020 | Probably yes | Definitely yes | Definitely yes | Probably yes | N/A |
| Bolge et al 2017 | Probably no | Probably no | Definitely yes | Probably yes | N/A |
| Boeri et al 2019 | Probably yes | Probably no | Definitely yes | Definitely yes | Probably yes |
| Bolt et al 2019 | Probably yes | Probably yes | Definitely yes | Definitely yes | Probably yes |
| Husni et al 2016 | Probably yes | Probably no | Definitely yes | Probably yes | Probably yes |
| Louder et al 2016 | Definitely yes | Probably yes | Definitely yes | Probably yes | Probably yes |

Risk of bias was assessed using the McMaster University CLARITY group Risk of Bias Instrument for Cross-Sectional Surveys of Attitudes and Practices.

a Simple choice questions were classed as ‘Probably yes’ for the clinical sensibility item despite a lack of formal assessment.

b For most studies this item is N/A, as the preference question was a simple choice between SC and IV administration.

N/A, not applicable.
